# Supplementary material for: Constructing FeSe2 nanorods supported on ketjenblack with superior cyclability for potassium-ion batteries
Source: Royal Society of Chemistry journal article supplement (doi:10.1039/d4ta02936d), 2024-01-01
Supplement: d4ta02936d1.pdf [file d4ta02936d1.pdf]

## Supporting Information

# Constructing FeSe<sub>2</sub> nanorods supported on ketjenblack with superior cyclability for potassium-ion batteries

*Bi-Cui Chen<sup>1</sup>, Xian Lu<sup>1</sup>, Hou-Yang Zhong<sup>1</sup>, Pei-Weng Huang<sup>1</sup>, Ya-Nan Wu<sup>1</sup>, Si-Yu Xu<sup>1</sup>, Xue-You Tan<sup>2,\*</sup> and Xiao-Hui Wu<sup>1,\*</sup>*

1 College of Chemistry and Materials Science, Fujian Provincial Key Laboratory of Advanced Materials Oriented Chemical Engineering, Fujian Normal University, Fuzhou 350007, China. E-mail: sherrywu@fjnu.edu.cn

2 Guangxi Key Laboratory of Automobile Components and Vehicle Technology, School of Mechanical and Automotive Engineering, Guangxi University of Science and Technology, Liuzhou, 545006, P. R. China. E-mail: tanxueyou123@163.com

---

## Experiments

### Chemicals and Materials

Ferrocene ( $\text{Fe}(\text{C}_5\text{H}_5)_2$ , 99%), selenium powder (99.99%), and perylene-3,4,9,10-tetracarboxylic dianhydride (PTCDA, 98%) were brought from Adamas. Red phosphorus powder (97.00%) was purchased from Acros. Ketjen black (KB) and carboxy methyl cellulose sodium (NaCMC, 99%) were obtained from Canrd. Poly(vinylidene difluoride) (PVDF, 99.5%) was purchased from SOLVAY. N, N-dimethylformamide (DMF, 99.5%) was purchased from Greagent. All the above reagents were used directly without additional treatment.

### Materials Synthesis

#### Synthesis of $\text{FeSe}_2@\text{C-x}$ (x=0, 1, 3, 5) and $\text{FeP}@\text{C-3}$

Taking the synthesis of  $\text{FeSe}_2@\text{C-3}$  as an example: 100 mg ferrocene (0.5 mmol), 160 mg selenium powder (2.0 mmol), and 30 mg carbon black were mixed evenly. The mixture was transferred to a quartz tube which was evacuated using an oil pump and then sealed. The vacuum-sealed quartz tube was placed in a double-temperature zone tube furnace for high-temperature selenization. After preheating at 110°C for 10 minutes, the temperature of the sample end was set to 450°C and the non-sample end to 300°C for 30 minutes. After the quartz tube cools to room temperature,  $\text{FeSe}_2@\text{C-3}$  could be obtained. Under the condition that other preparation conditions remain unchanged, the addition of raw materials for different samples was listed in the following table:

| Sample                     | Ferrocene (mg) | Selenium (mg) | Red phosphorus (mg) | KB (mg) |
|----------------------------|----------------|---------------|---------------------|---------|
| $\text{FeSe}_2@\text{C-0}$ | 100            | 160           | 0                   | 0       |
| $\text{FeSe}_2@\text{C-1}$ | 100            | 160           | 0                   | 10      |
| $\text{FeSe}_2@\text{C-3}$ | 100            | 160           | 0                   | 30      |
| $\text{FeSe}_2@\text{C-5}$ | 100            | 160           | 0                   | 50      |
| $\text{FeP}@\text{C-3}$    | 100            | 0             | 60                  | 30      |

---

## Materials Characterization

The crystalline phases of the as-prepared samples were characterized via the powder X-ray diffractometer (PXRD, Bruker D8 Advance) with Cu K $\alpha$  radiation ( $\lambda = 1.5418$  Å). The structure and composition of the as-prepared samples were characterized by scanning electron microscopy (SEM, Hitachi SU8100), regular transmission electron microscopy (TEM, JEOL 2100F), and high-resolution transmission electron microscope (HRTEM) including high-angle annular dark-field scanning transmission electron microscope (HAADF-STEM) equipped with associated the energy dispersive X-ray spectroscopy (EDS). The chemical compositions and the bonding structures were determined by X-ray photoelectron spectroscopy (XPS) spectra (Thermo ESCALAB 250XI). Raman spectra were obtained by using a Micro-Raman spectroscopy system (LabRAM HR Evolution) under a laser excitation of 532 nm wavelength. The specific surface area was measured with a BELSORP-Mini II instrument. Thermal gravimetric analysis (TGA NETZSCH STA 449F3) was performed up to 800°C at a heating rate of 10°C/min in the air atmosphere.

## Electrochemical Measurements

### 1. Half Cells

The electrochemical properties of samples were measured using coin cells (CR2032). The electrodes were obtained via the following method: 40 mg samples, 5 mg KB, and 5 mg PVDF (8: 1: 1) were dispersed in NMP to form a slurry under continuous stirring. Subsequently, the slurry was smeared on copper foil uniformly, and dried at 80°C for 12 h. The loading of the active materials was ensured at approximately 0.8-1.2 mg cm<sup>-2</sup>. The fabricated electrode was used to construct the half-cells in an Ar-filled glove box. The half cells were assembled by using the synthesized FeSe<sub>2</sub>@C-x (x=0, 1, 3, 5), FeP@C-3 or PTCDA electrodes as the working electrodes, potassium as the reference electrode, Whatman GF/D glass fiber as the separator and 1.0 M KFSI solution in a mixture of Ethylene Carbonate and Diethyl Carbonate (1: 1 in volume) as the electrolyte. The voltage range for the PTCDA-based half cells was 1.5-3.5 V but 0.005-2.8 V for the other half cells. The galvanostatic charge/discharge tests were carried out

---

at 30°C using a LAND cyler test system. Both cyclic voltammetry (CV) and electrochemical impedance spectroscopy (EIS) were performed with a CHI660d electrochemistry workstation (CH instrument, Shanghai).

## 2. Full Cells

The preparation was similar to the half cells. In a full cell, the FeSe<sub>2</sub>@C-3 electrode was used as the anode and the PTCDA electrode was applied as the cathode. Before assembling the full cells, the PTCDA cathodes were pre-cycled in half-cells at 0.1 A g<sup>-1</sup> between 1.5 and 3.5 V for three turns, and the FeSe<sub>2</sub>@C-3 anode was cycled in half-cells for two cycles over a potential range of 0.005 to 2.8 V and then discharged to 0.005 V at 0.1 A g<sup>-1</sup>. The voltage range for the full cells was 0.5-3.4 V.

## Theoretical Calculations

To explore the effect of the structure of FeSe<sub>2</sub> and FeP on potassiation process, the first principles calculation based on the density functional theory (DFT) was carried out at the atomic level. The K<sup>+</sup> adsorption energy on the FeSe<sub>2</sub> and FeP were calculated in DMol<sup>3</sup> code.<sup>1</sup> The molecular dynamics (MD) simulations were performed based on the density functional theory (DFT) using the Forcite module.

1. The construction of three models: A supercell of FeSe<sub>2</sub> (2×2×1) with the parameters of a=9.608 Å, b=11.568 Å, c= 3.586 Å, α= β= γ= 90° was built as sc- FeSe<sub>2</sub> model; A supercell of FeP (2×1×1) with the parameters of a=10.386 Å, b=6.198 Å, c= 5.792 Å, α= β= γ= 90° was built as sc-FeP model. The chemical formula of sc- FeSe<sub>2</sub> and sc-FeP is Fe<sub>8</sub>Se<sub>16</sub> and Fe<sub>8</sub>P<sub>8</sub>, respectively. The geometry optimization process employed the Perdew-Burke-Eznerhof (PBE) with generalized gradient approximation (GGA) for the exchange-correlation functional.<sup>2</sup> The basis-set was double numerical orbital base group and orbital polarization function (DNP) and the basis file was set to be 3.5. The Grimme scheme was included for the dispersion correction.<sup>3</sup> During the coordinate's relaxation, the convergence criteria for the geometry optimization were set to 2.0 × 10<sup>-5</sup> Ha for energy, 0.004 Ha Å<sup>-1</sup> for force, and 0.005 Å for displacement. The self-consistent field convergence for the single point energy calculation was set to 1.0 × 10<sup>-5</sup> Ha, and global orbital cutoff is 5.0 Å. The Monkhorst-Pack k-point mesh was

---

0.04 1/Å.

2. The calculation of K<sup>+</sup> intercalation energy: The K<sup>+</sup> intercalation energies ( $E_{in}$ ) of sc-FeSe<sub>2</sub> and sc-FeP models were calculated as follows:

$$E_{in} = E_{\text{composite}} - E_{\text{pristine}} - E_K$$

where  $E_{\text{composite}}$  was the total energy of the sc- FeSe<sub>2</sub> and sc-FeP after K intercalation,  $E_{\text{pristine}}$  was the total energy of geometry-optimized sc- FeSe<sub>2</sub> and sc-FeP, and  $E_K$  is the chemical potential of K atom.

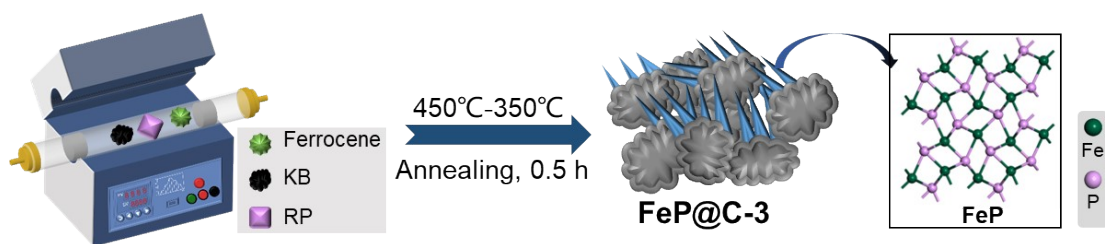

Figure S1. Scheme of the synthesis process for FeP@C-3 sample.

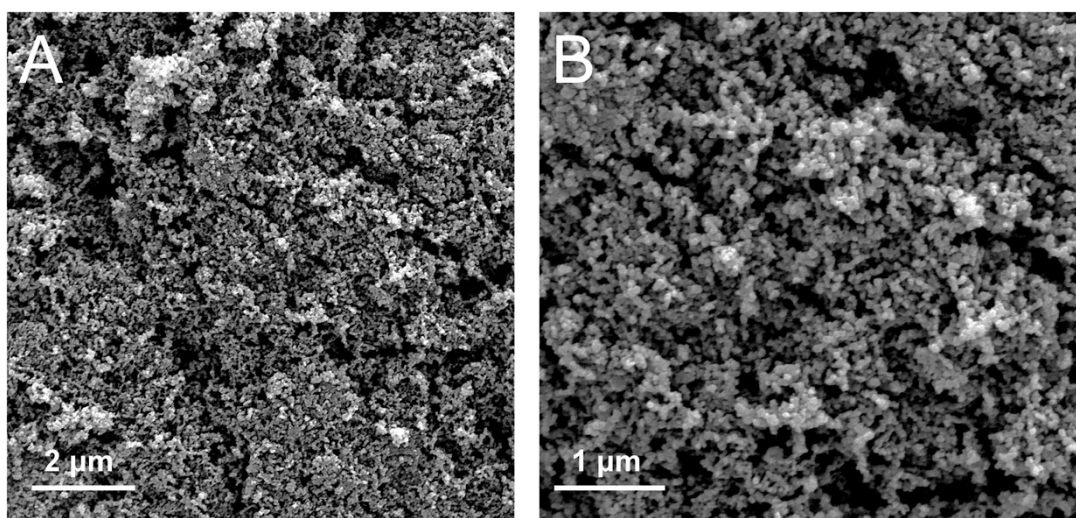

Figure S2. SEM images of KB carbon at different magnifications.

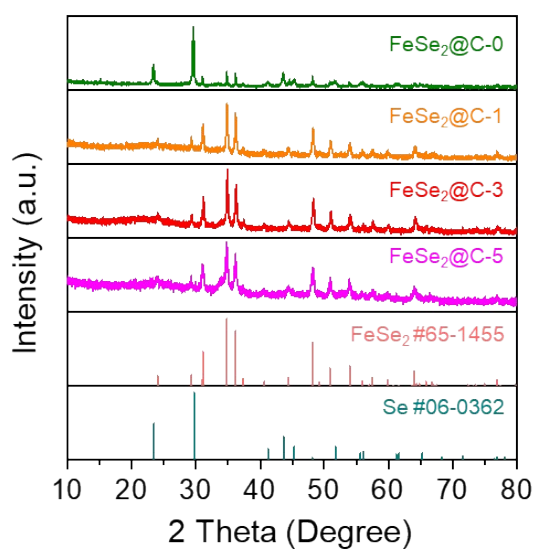

Figure S3. PXRD patterns of FeSe<sub>2</sub>@C-0, FeSe<sub>2</sub>@C-1, FeSe<sub>2</sub>@C-3, and FeSe<sub>2</sub>@C-5 samples along with the corresponding standard patterns of FeSe<sub>2</sub> and Se.

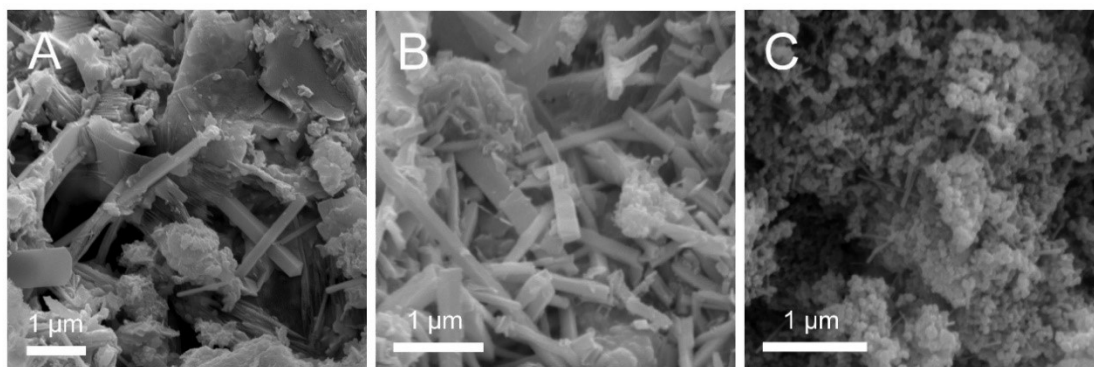

Figure S4. SEM images of (A) FeSe<sub>2</sub>@C-0, (B) FeSe<sub>2</sub>@C-1, and (C) FeSe<sub>2</sub>@C-5.

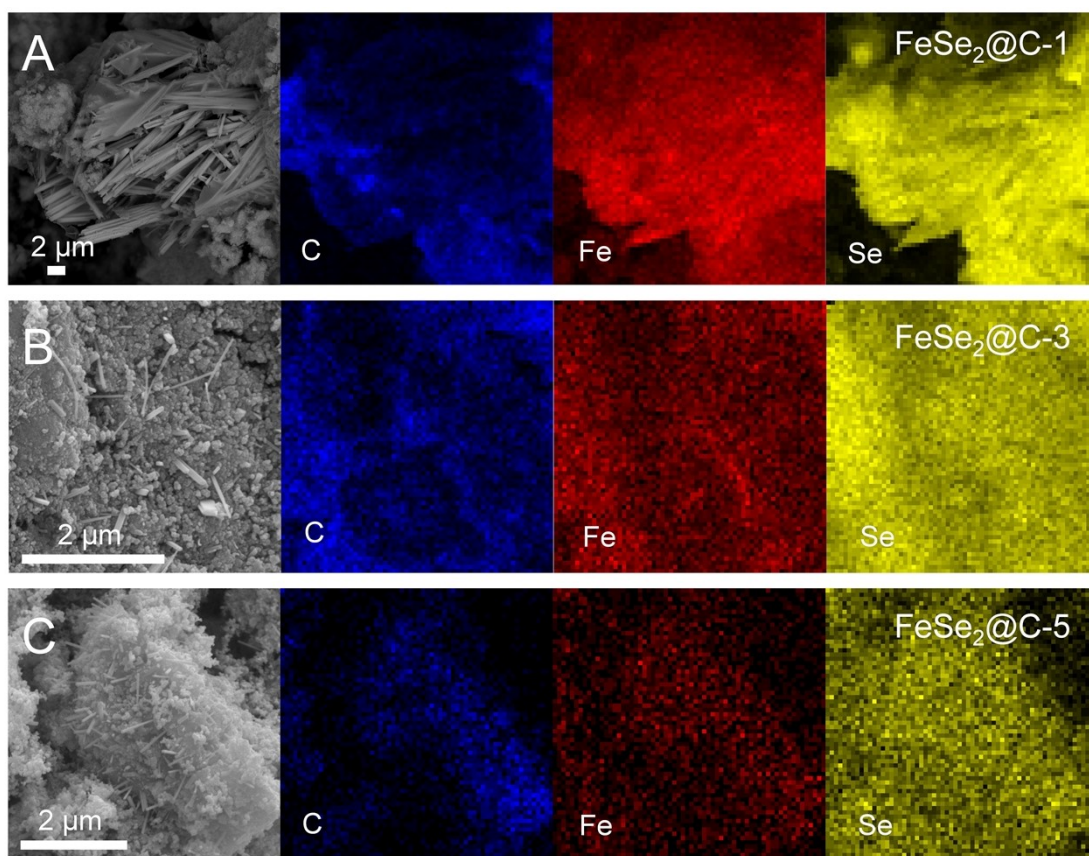

Figure S5. The element mapping of (A) FeSe<sub>2</sub>@C-1, (B) FeSe<sub>2</sub>@C-3, and (C) FeSe<sub>2</sub>@C-5.

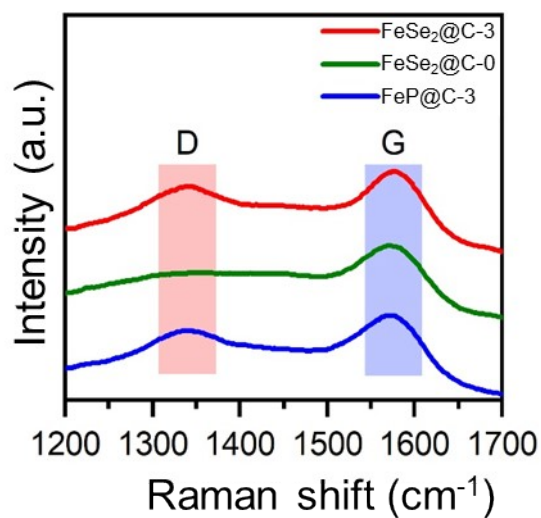

Figure S6. Raman spectra of FeSe<sub>2</sub>@C-3, FeSe<sub>2</sub>@C-0 and FeP@C-3 in the range of 1200-1700 cm<sup>-1</sup>

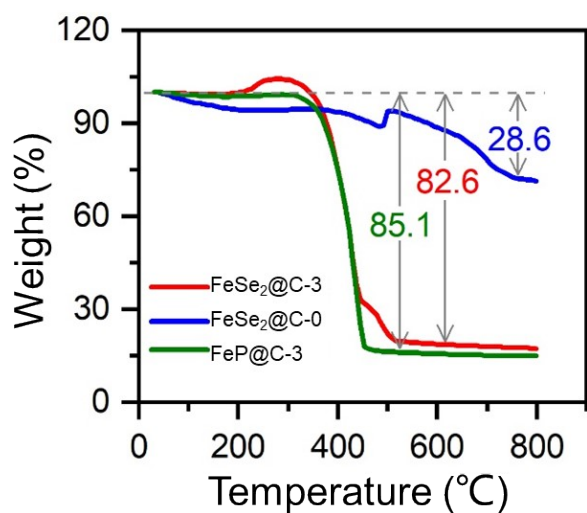

Figure S7. TG analysis curves of FeSe<sub>2</sub>@C-3, FeP@C-3, and FeSe<sub>2</sub>@C-0 in air atmosphere from 30-800°C.



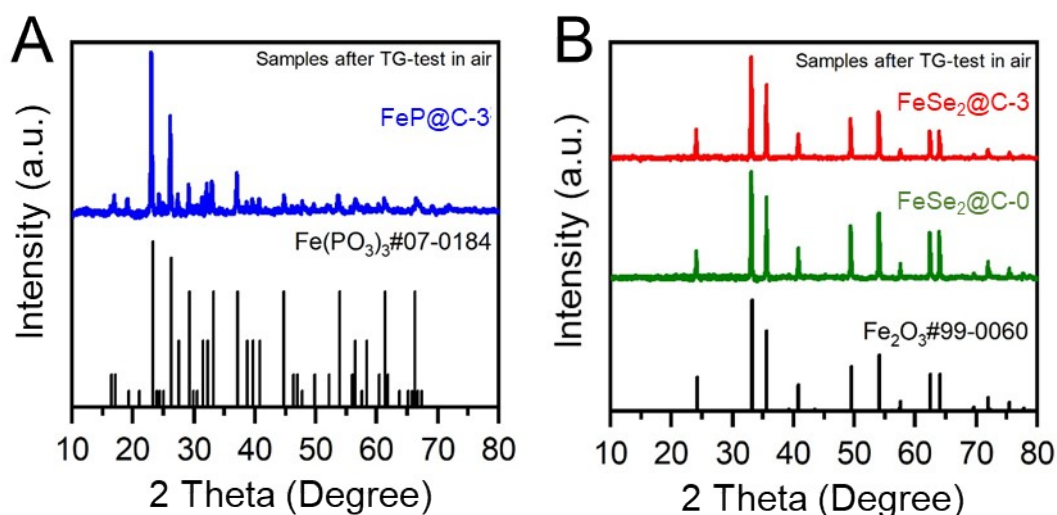

Figure S8. PXRD patterns of annealed (A) FeP@C-3, (B) FeSe<sub>2</sub>@C-3, and FeSe<sub>2</sub>@C-0 samples after TG test in air atmosphere from 30-800°C.

#### The calculation process:

Based on the above results, let  $x$  represent the mass percentage of FeSe<sub>2</sub> in FeSe<sub>2</sub>@C-3, and let  $y$  represent the mass percentage of FeP in FeP@C-3. The following equation is used for calculation:

$$(100\% - 82.6\%) * \frac{56 * 2}{56 * 2 + 16 * 3} = x * \frac{56}{56 + 79 * 2} \quad (1)$$

$$(100\% - 28.6\%) * \frac{56}{56 + (31 + 16 * 3) * 3} = y * \frac{56}{56 + 31} \quad (2)$$

By calculation, the mass percentage of FeSe<sub>2</sub> in FeSe<sub>2</sub>@C-3 material is 46.5%, and the mass percentage of FeP in FeP@C-3 material is 21.2%. Further calculation reveals that the atomic percentage of FeSe<sub>2</sub> in FeSe<sub>2</sub>@C-3 material is 4.5%, and the atomic percentage of FeP in FeP@C-3 material is 3.6%.

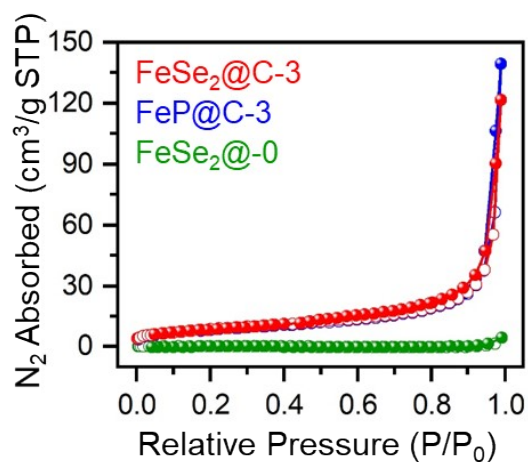

Figure S9.  $N_2$  adsorption-desorption isotherms of  $FeSe_2@C-3$ ,  $FeP@C-3$  and  $FeSe_2@C-0$ .

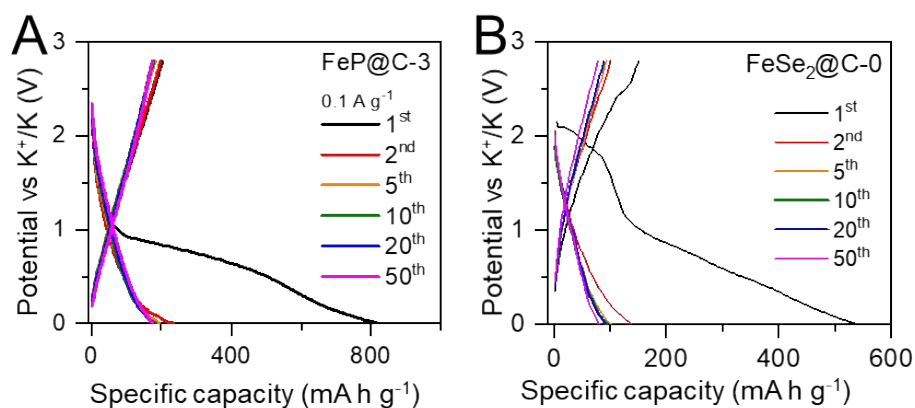

Figure S10. The discharge-charge curves of (A)  $FeP@C-3$  and (B)  $FeSe_2@C-0$  electrode at different cycles at  $0.1 \text{ A g}^{-1}$ .

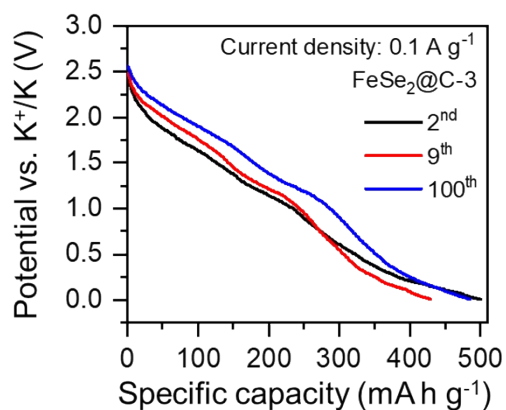

Figure S11. The galvanostatic discharge profiles of  $FeSe_2@C-3$  at the 2<sup>nd</sup>, 9<sup>th</sup>, and 100<sup>th</sup> cycles at  $0.1 \text{ A g}^{-1}$ .

Table S1. The specific capacity increments of FeSe<sub>2</sub>@C-3 electrode in three voltage ranges.

| Voltage range (V) | Specific capacity (mA h g <sup>-1</sup> ) |                 |                   |                  |                    |
|-------------------|-------------------------------------------|-----------------|-------------------|------------------|--------------------|
|                   | 2 <sup>nd</sup>                           | 9 <sup>th</sup> | 100 <sup>th</sup> | $\Delta C_{9-2}$ | $\Delta C_{100-9}$ |
| 0.5-0.005         | 175                                       | 122             | 133               | -53              | 11                 |
| 1.5-0.5           | 196                                       | 164             | 174               | -32              | 10                 |
| 2.6-1.5           | 126                                       | 141             | 176               | 15               | 35                 |
| Full range        | 497                                       | 427             | 483               | -70              | 56                 |

Table S2. Comparison of the cycling performance of FeSe<sub>2</sub>@C-3 and other FeSe<sub>2</sub>-based materials for PIBs anodes.

| Material                 | Current density<br>(A g <sup>-1</sup> ) | Cycle<br>number | Specific capacity<br>(mA h g <sup>-1</sup> ) | Ref.         |
|--------------------------|-----------------------------------------|-----------------|----------------------------------------------|--------------|
| FeSe <sub>2</sub> @C-3   | 0.1                                     | 100             | 486                                          | This<br>work |
|                          | 1.0                                     | 3500            | 286                                          |              |
| NFS@NC@C                 | 5.0                                     | 1200            | 107.7                                        | 4            |
| FeSe <sub>2</sub> /NC    | 1.0                                     | 250             | 301                                          | 5            |
| FeSe <sub>2</sub> @NC    | 2.0                                     | 5000            | 24.1                                         | 6            |
| FeSe <sub>2</sub> /N-C   | 2.0                                     | 2000            | 158                                          | 7            |
| FeSe <sub>2</sub> @C NBs | 0.1                                     | 700             | 221                                          | 8            |

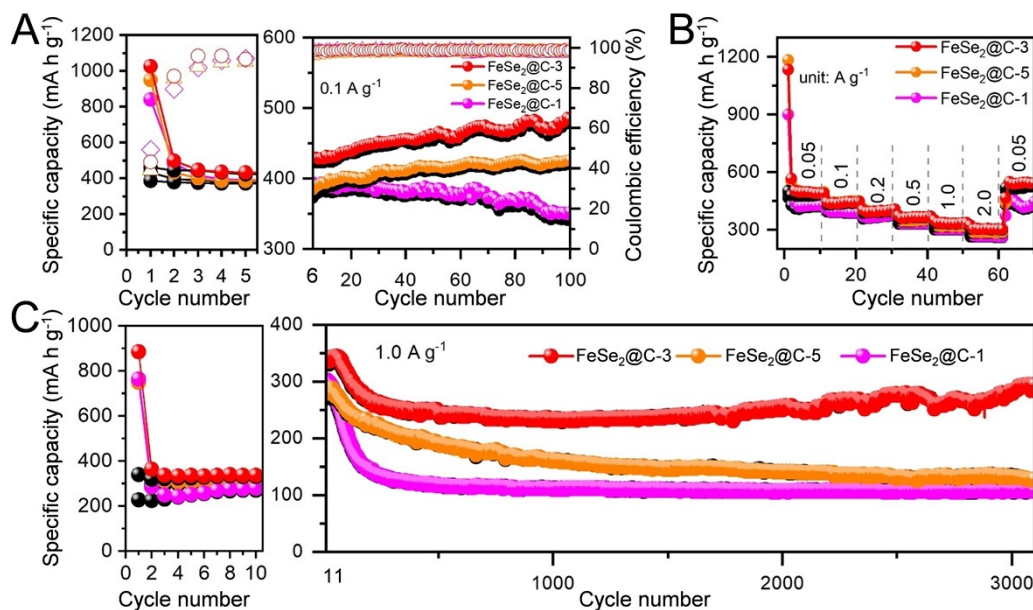

Figure S12. (A) The cycling performance at a current density of 0.1 A g<sup>-1</sup>, (B) rate performance at various current densities, and (C) long-term cyclic performance at 1.0 A g<sup>-1</sup> of FeSe<sub>2</sub>@C-3, FeSe<sub>2</sub>@C-1 and FeSe<sub>2</sub>@C-5 electrodes.

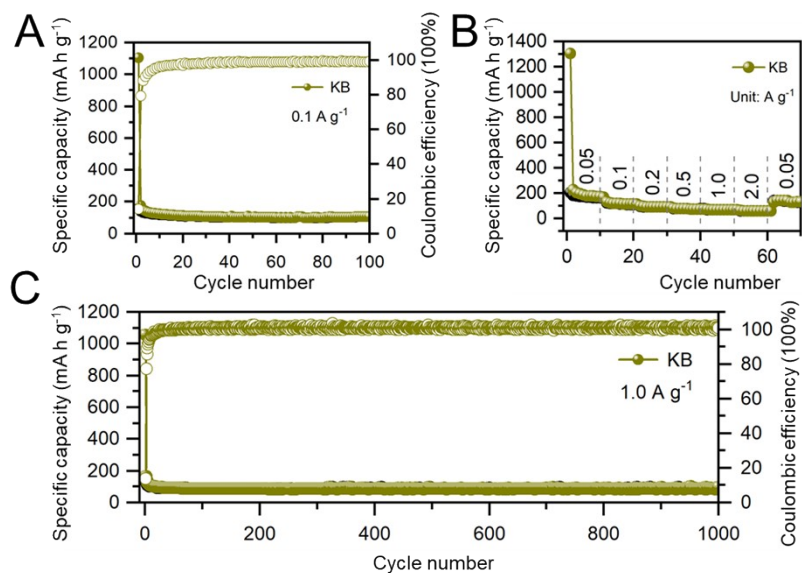

Figure S13. (A) Cycling performance, (B) rate performance and (C) long-term cyclic performance of the KB electrode.

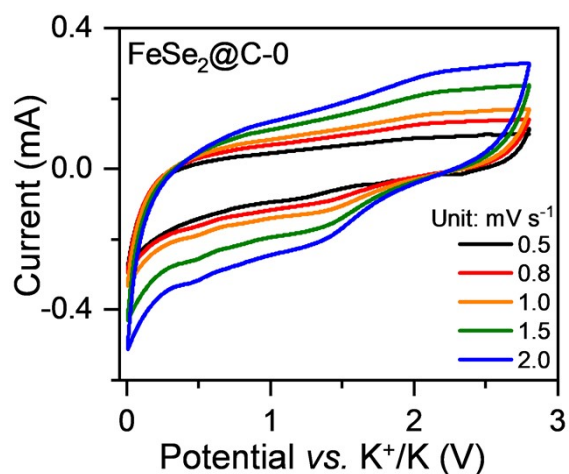

Figure S14. CV curves of FeSe<sub>2</sub>@C-0 electrode at different scan rates from 0.5 to 2.0 mV s<sup>-1</sup>.

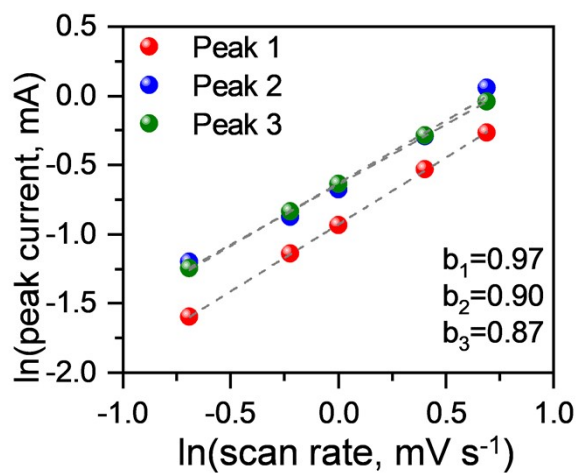

Figure S15. The ln(i) versus ln(v) plot of the peak current of FeSe<sub>2</sub>@C-3.

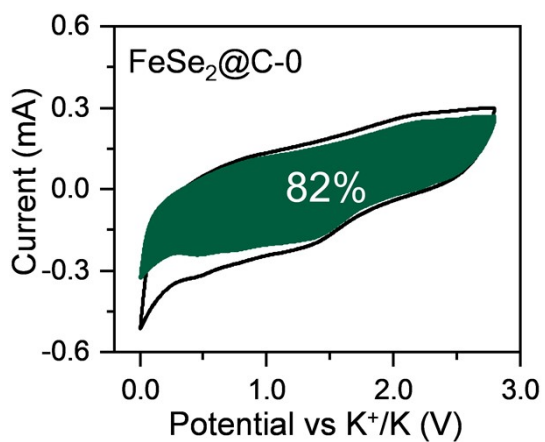

Figure S16. The capacitive charge storage contribution to the charge storage at 0.5 mV s<sup>-1</sup> for the FeSe<sub>2</sub>@C-0 electrode.

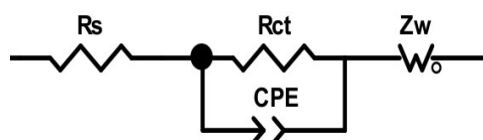

Figure S17. The equivalent circuit for the EIS spectra of the FeSe<sub>2</sub>@C-3, FeP@C-3, and FeSe<sub>2</sub>@C-0 electrodes.

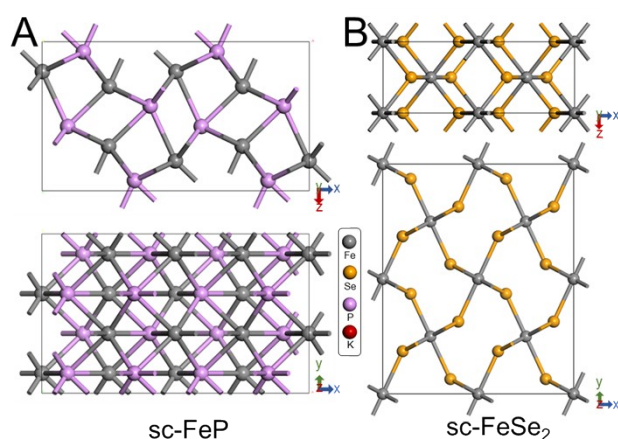

Figure S18. The constructed models of (A) sc-FeP and (B) sc-FeSe<sub>2</sub>.

## References

1. Delley, B., From molecules to solids with the DMol3 approach. *The Journal of Chemical Physics* **2000**, *113* (18), 7756-7764.
2. Perdew, J. P.; Burke, K.; Ernzerhof, M., Generalized gradient approximation made simple. *Physical Review Letters* **1996**, *77* (18), 3865.
3. Grimme, S.; Antony, J.; Ehrlich, S.; Krieg, H., A consistent and accurate ab initio parametrization of density functional dispersion correction (DFT-D) for the 94 elements H-Pu. *The Journal of Chemical Physics* **2010**, *132* (15), 154104.
4. Gong, J.; Zhang, R.; Wei, X.; Liu, Y.; Luo, Q.; Wan, Q.; Zheng, Q.; Wang, L.; Liu, S.; Lin, D., Spatially dual-confined metallic selenide double active centers for boosting potassium ion storage. *Chemical Engineering Journal* **2023**, *459*, 141609.
5. Liu, Y. Z.; Yang, C. H.; Li, Y. P.; Zheng, F. H.; Li, Y. J.; Deng, Q.; Zhong, W. T.; Wang,

- 
- G.; Liu, T. Z., FeSe<sub>2</sub>/nitrogen-doped carbon as anode material for Potassium-ion batteries. *Chemical Engineering Journal* **2020**, *393*, 124590.
6. Wu, H.; Lu, S.; Xu, S.; Zhao, J.; Wang, Y.; Huang, C.; Abdelkader, A.; Wang, W. A.; Xi, K.; Guo, Y.; Ding, S.; Gao, G.; Kumar, R. V., Blowing Iron Chalcogenides into Two-Dimensional Flaky Hybrids with Superior Cyclability and Rate Capability for Potassium-Ion Batteries. *ACS Nano* **2021**, *15* (2), 2506-2519.
7. Ge, J. M.; Wang, B.; Wang, J.; Zhang, Q. F.; Lu, B. G., Nature of FeSe<sub>2</sub>/N-C Anode for High Performance Potassium Ion Hybrid Capacitor. *Advanced Energy Materials* **2020**, *10* (4), 1903277.
8. Liu, C.; Li, Y. J.; Feng, Y. H.; Zhang, S.; Lu, D.; Huang, B. Y.; Peng, T.; Sun, W. W., Engineering of yolk-shelled FeSe<sub>2</sub>@nitrogen-doped carbon as advanced cathode for potassium-ion batteries. *Chinese Chemical Letters* **2021**, *32* (11), 3601-3606.
